# Supplementary material
Source: publisher site journal article supplement (https://www.dovepress.com/get_supplementary_file.php?f=395228.docx)
Supplement: Supplementary file 1 [file get_supplementary_file.php]

Supplementary Fig 1. The Serum total 25OHD level 3 months post-operation in the control and VitD deficiency groups (both n=7) are 22.57 (17.09, 31.35) ng/mL and 8.54 (5.34,15.86) ng/mL, respectively. No significant difference was found in both groups when compared with the baseline (24.26 (22.91, 37.84) ng/mL for control group and 9.65 (6.66, 14.83) ng/mL for VitD deficiency group).
